# Supplementary material for: Insight into the dynamic transformation properties of microplastic-derived dissolved organic matter and its contribution to the formation of chlorination disinfection by-products
Source: Royal Society of Chemistry journal article supplement (doi:10.1039/d4ra05857g), 2024-01-01
Supplement: d4ra05857g1.pdf [file d4ra05857g1.pdf]

1

## Supplementary Material

2 **Insight into the dynamic transformation properties of microplastic-**  
3 **derived dissolved organic matter and its contribution to the**  
4 **formation of chlorination disinfection by-products**

5 Yingyue Zhou\*, Feng Zeng, Kunyan Cui, Longxia Lan, Hao Wang, Weiqian Liang\*

6 \*Corresponding authors

7 School of Chemistry, Sun Yat-sen University, Guangzhou 510000, China

8 E-mail: [qian378378@163.com](mailto:qian378378@163.com)

9 [Zhou-Yingyue@hotmail.com](mailto:Zhou-Yingyue@hotmail.com)

10 Phone: 020-84114133

11

## 12 **Characterization methods**

13 The UV absorbance of the PSMPs-DOM was measured in 1 cm quartz cuvettes  
14 between 200 and 800 nm at a wavelength step size of 1 nm with ultrapure water as blank.  
15 The absorption coefficient  $\alpha(\lambda)$  ( $\text{m}^{-1}$ ) was calculated using the equation (Helms et al.,  
16 2008) :

$$17 \quad \alpha(\lambda) = 2.303A_{\lambda}/L$$

18 where  $A_{\lambda}$  is the absorbance at the position  $\lambda(\text{nm})$ , and L is the optical path diameter  
19 (0.01m).

20 The spectral slope (S,  $\text{nm}^{-1}$ ) was obtained by a non-linear exponential decay  
21 model, and  $S_{275-295}$  was the S value at wavelengths of 275-295 nm (Helms et al., 2008).  
22 This value was used to characterize the relative molecular size of the DOM.

$$23 \quad \alpha_{\lambda} = \alpha_{\lambda_0} e^{-S(\lambda - \lambda_0)}$$

24 where  $\alpha_{\lambda_0}$  is the absorption coefficient at the reference wavelength  $\lambda_0$ , and S is the  
25 spectral slope.

26 The PSMPs-DOM solution was freeze-dried using a freeze dryer (Alpha 1-4 LD  
27 Plus) before the scanning of the Fourier transform infrared spectrometer. The scan  
28 range of FTIR spectroscopy was 400-4000  $\text{cm}^{-1}$ , and the scan resolution was 4  $\text{cm}^{-1}$ .  
29 Each FTIR spectrum was processed with PerkinElmer Spectrum software for baseline  
30 correction.

31 Three-dimensional excitation emission matrix fluorescence spectra (3D-EEMs)  
32 were taken with the excitation wavelengths ranging from 220 nm to 550 nm (scan  
33 interval of 1nm), and the emission wavelengths ranging from 250 nm to 650 nm (scan  
34 interval of 5nm) for PSMPs-DOM. In addition, the fluorescence spectrum of the

35 ultrapure water was measured and subtracted from the EEM spectrum of the DOM to  
36 eliminate the Raman scattering effect (Christensen et al., 2005). The synchronous  
37 fluorescence spectra were obtained in the wavelength range of 340-650 nm with a  
38 constant offset ( $\Delta\lambda = 120$  nm), and the scan interval was 1 nm and the scan speed was  
39 600 nm/min<sup>-1</sup>.

40 PARAFAC analysis was performed in MATLAB2021a (MathWorks, USA) using  
41 the DOMFluor toolbox (Stedmon and Bro, 2008). Rayleigh and Raman scatters were  
42 removed before PARAFAC analysis (Zepp et al., 2004). Split-half analysis, residual  
43 analysis, and core consistency analysis were used to validate the model and the number  
44 of fluorescent components (Stedmon and Bro, 2008). The values for each PARAFAC  
45 fluorescent component was represented by the maximum fluorescence intensity ( $F_{\max}$ )  
46 (Stedmon and Markager, 2005).

47 The 2D-COS method was implemented to analyze the FTIR data, and the  
48 concentration of chlorination was used as the perturbation variable. 2D-COS analysis  
49 can extend the one-dimensional spectrum into two-dimensional spectra to catch the  
50 signal peak variation (Noda et al., 2000). The order of change of the functional groups  
51 was judged according to the positive/negative cross peaks of the synchronous and  
52 asynchronous spectra. The 2D-COS was calculated using the 2D-shige software created  
53 by Kwansei-Gakuin University, Japan (Noda, 2006).

54

#### 55 **The detailed extraction methods of THMs.**

56 After 24 h of chlorination reaction, DBPs were extracted from the samples through

57 liquid-liquid extraction method based on USEPA 551.1 with some modifications (Koh  
58 et al., 2022). 3 mL methyl tert-butyl ether (MTBE) containing 4 g anhydrous sodium  
59 sulfate was added to the samples, and the mixed solutions were shaken until the solids  
60 were mostly dissolved. After 20 min of settling, 1 mL solution from the organic phase  
61 was drawn out for analysis.

## 62 Reference

- 63 Christensen, J.H., Hansen, A.B., Mortensen, J., Andersen, O., 2005. Characterization  
64 and matching of oil samples using fluorescence spectroscopy and parallel factor  
65 analysis. *Anal. Chem.* 77, 2210–2217. <https://doi.org/10.1021/ac048213k>
- 66 Helms, J.R., Stubbins, A., Ritchie, J.D., Minor, E.C., Kieber, D.J., Mopper, K., 2008.  
67 Absorption spectral slopes and slope ratios as indicators of molecular weight,  
68 source, and photobleaching of chromophoric dissolved organic matter. *Limnol.*  
69 *Oceanogr.* 53, 955–969. <https://doi.org/10.4319/lo.2008.53.3.0955>
- 70 Koh, K.Y., Chen, Z., Lin, S., Chandra Mohan, K., Luo, X., Chen, J.P., 2022. Leaching  
71 of organic matters and formation of disinfection by-product as a result of  
72 presence of microplastics in natural freshwaters. *Chemosphere* 299, 134300.  
73 <https://doi.org/10.1016/j.chemosphere.2022.134300>
- 74 Noda, I., 2006. Progress in two-dimensional (2D) correlation spectroscopy. *J. Mol.*  
75 *Struct.* 799, 2–15. <https://doi.org/10.1016/j.molstruc.2006.03.053>
- 76 Noda, I., Dowrey, A.E., Marcott, C., Story, G.M., Ozaki, Y., n.d. Generalized Two-  
77 Dimensional Correlation Spectroscopy.
- 78 Stedmon, C.A., Bro, R., 2008. Characterizing dissolved organic matter fluorescence  
79 with parallel factor analysis: a tutorial. *Limnol. Oceanogr. Methods* 6, 572–579.  
80 <https://doi.org/10.4319/lom.2008.6.572>
- 81 Stedmon, C.A., Markager, S., 2005. Tracing the production and degradation of  
82 autochthonous fractions of dissolved organic matter by fluorescence analysis.  
83 *Limnol. Oceanogr.* 50, 1415–1426. <https://doi.org/10.4319/lo.2005.50.5.1415>
- 84 Zepp, R.G., Sheldon, W.M., Moran, M.A., 2004. Dissolved organic fluorophores in  
85 southeastern US coastal waters: correction method for eliminating Rayleigh and  
86 Raman scattering peaks in excitation–emission matrices. *Mar. Chem.* 89, 15–  
87 36. <https://doi.org/10.1016/j.marchem.2004.02.006>

88

89

90

91

92

93

94

95

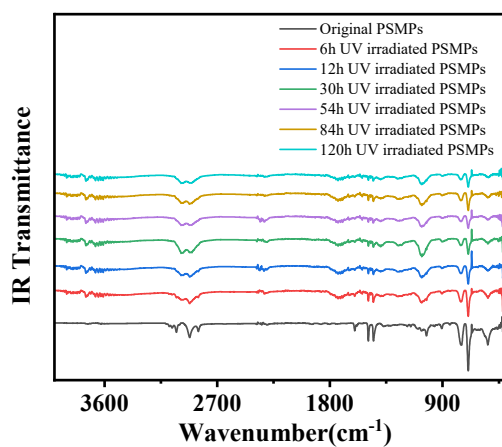

96

97

98

99

Fig. S1 FTIR spectra of original PSMPs and PSMPs under different UV irradiation time

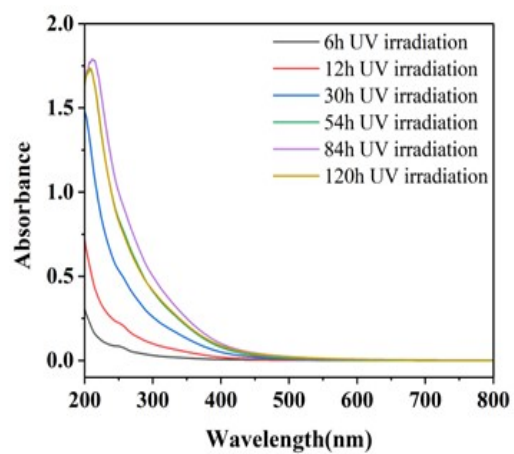

100

101

102

Fig. S2 UV-vis spectra of PSMPs-DOM under and different UV irradiation time

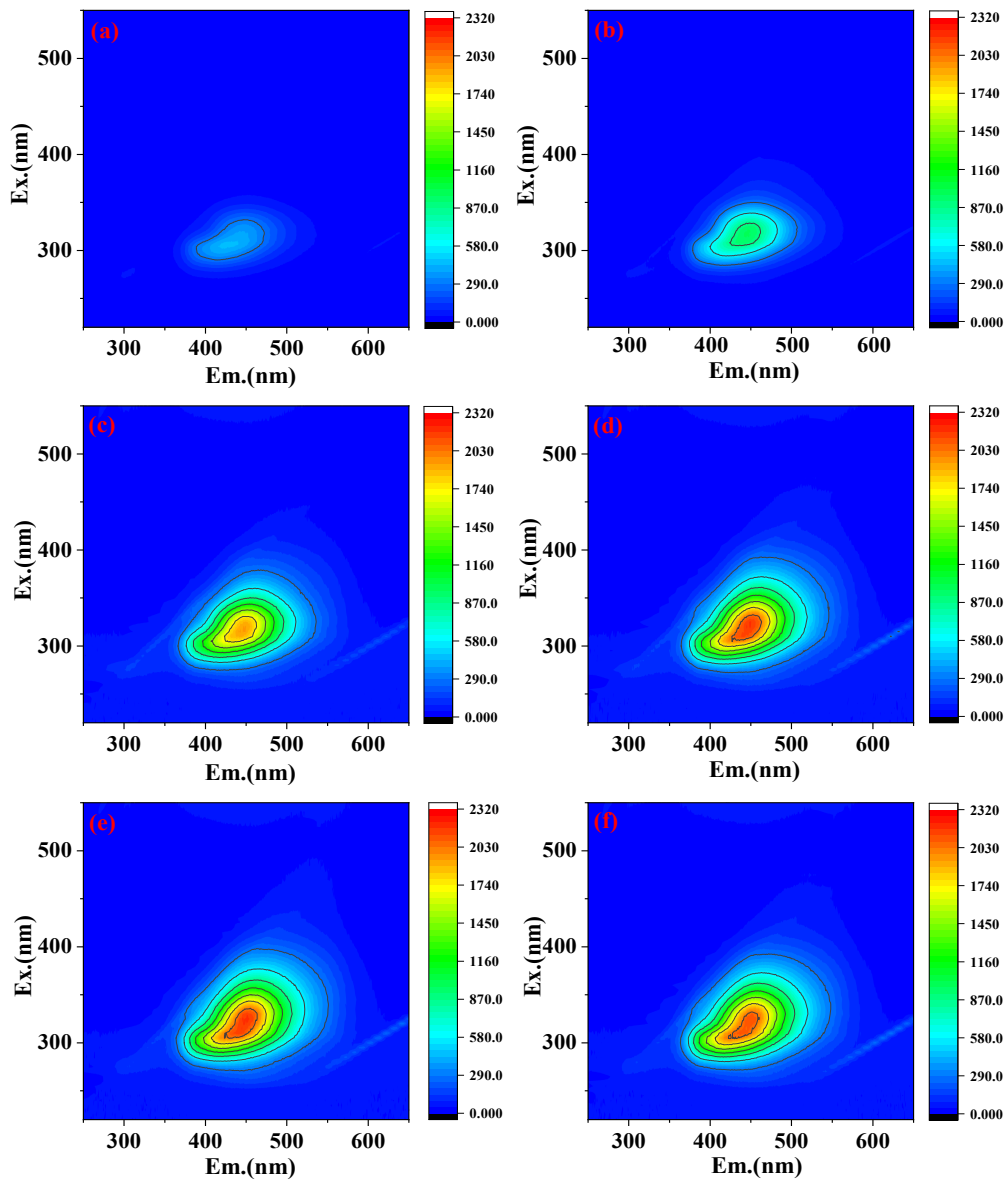

103

104

105

106

107

Fig. S3 EEM spectra of PSMPs-DOM under different UV irradiation time  
((a)-(f), 6, 12, 30, 54, 84, 120 h)

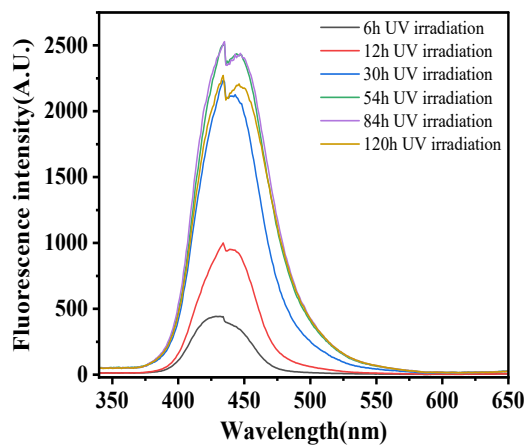

108  
 109 Fig. S4 Synchronous fluorescence spectra of PSMPs-DOM under different UV irradiation time  
 110  
 111

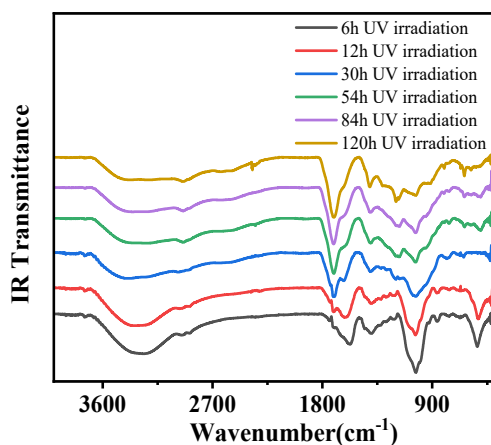

112  
 113 Fig. S5 FTIR spectra of PSMPs-DOM under different UV irradiation time  
 114  
 115

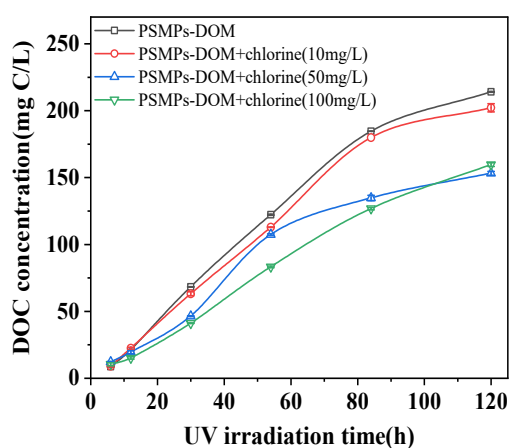

116  
 117 Fig. S6 DOC concentration of PSMPs-DOM before and after chlorination  
 118

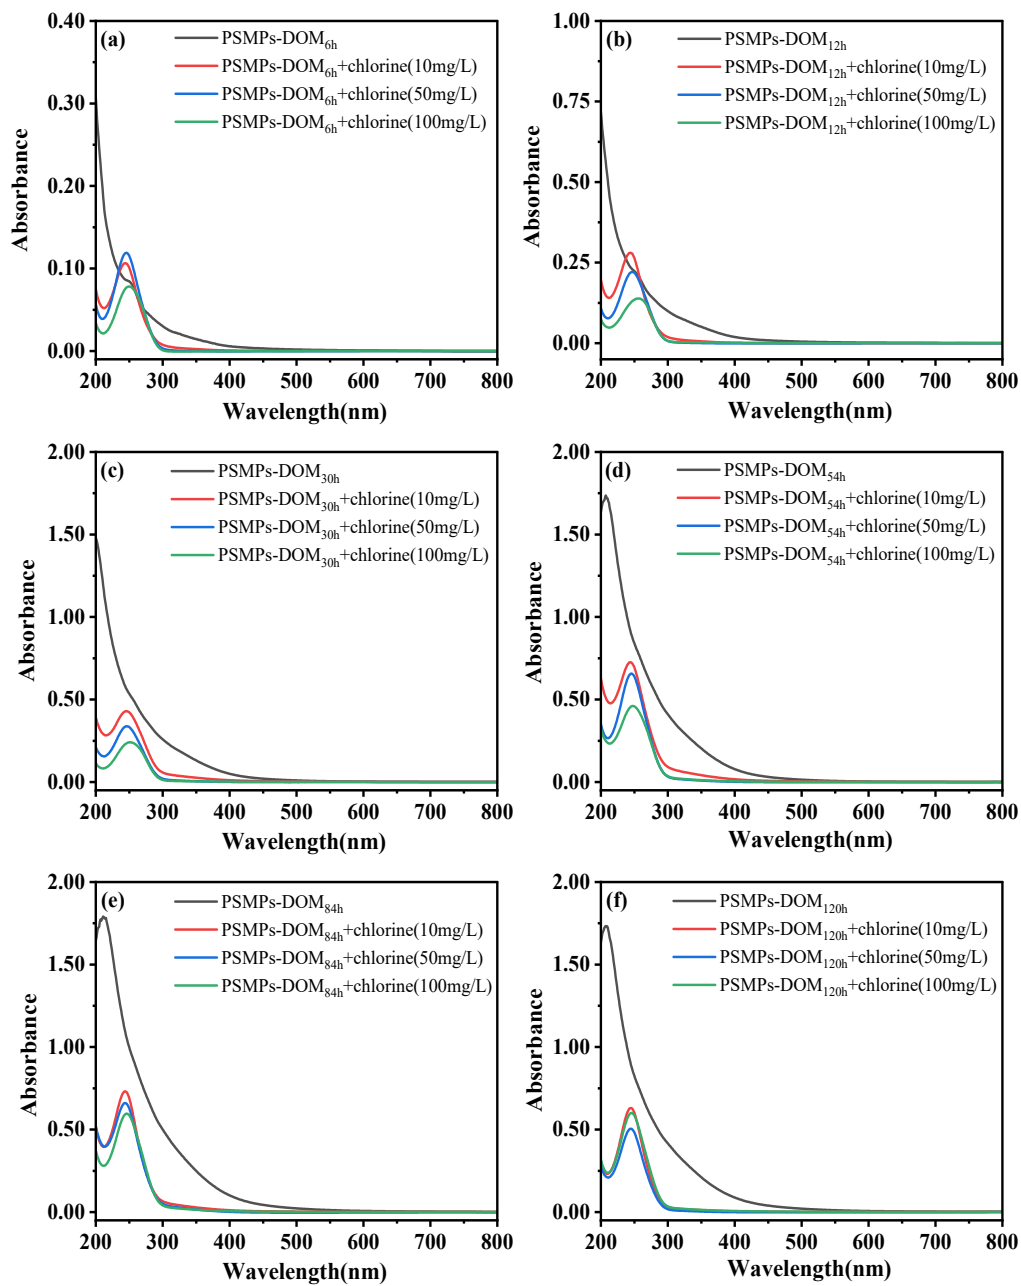

119

120

Fig. S7 UV-vis spectra of PSMPs-DOM before and after chlorination



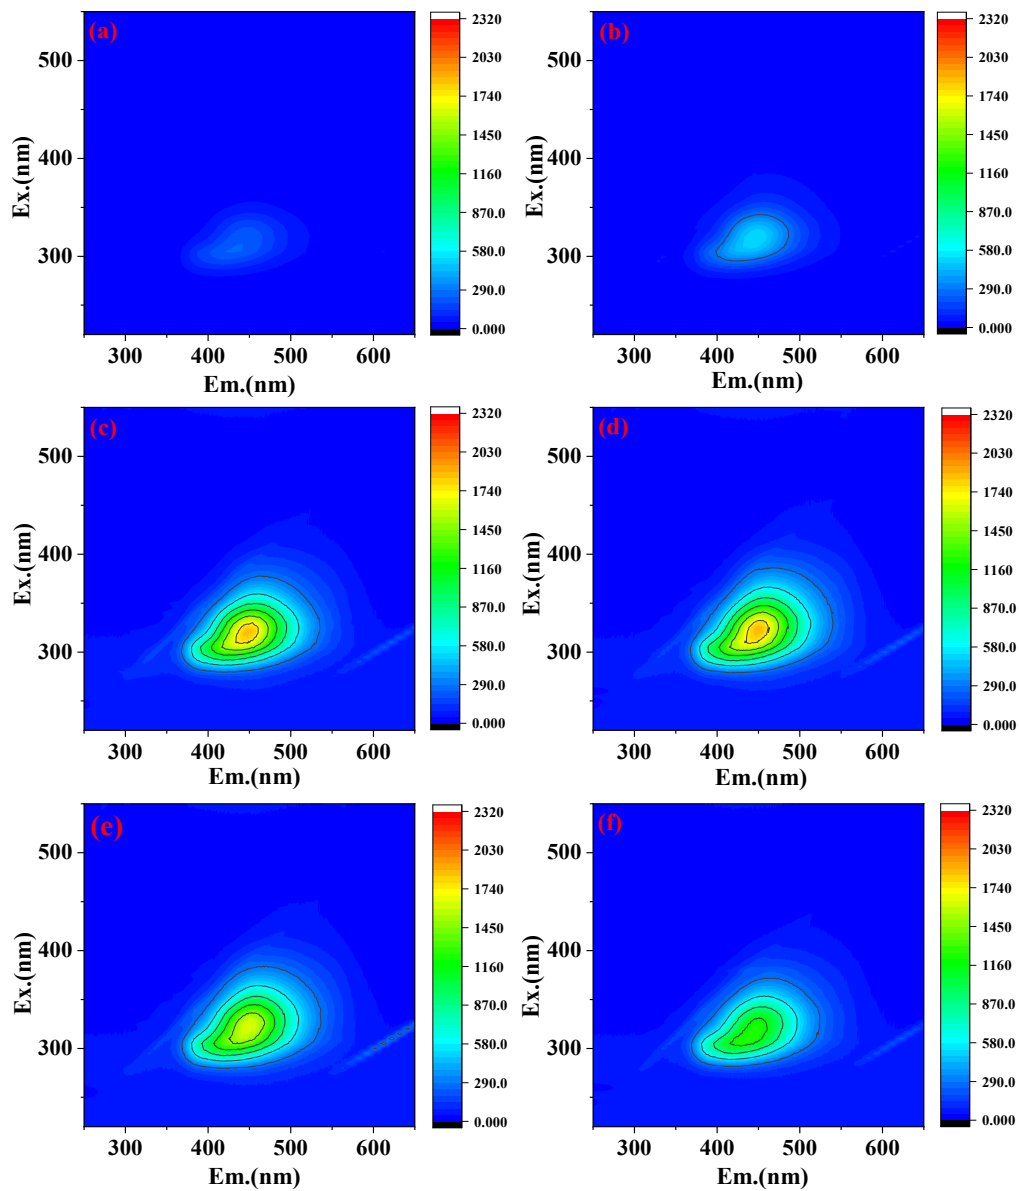

Fig. S8 EEM spectra of PSMPs-DOM<sub>x</sub> under 10 mg/L chlorination  
 ((a)-(f), x = 6, 12, 30, 54, 84, 120 h)

121  
 122  
 123  
 124  
 125  
 126  
 127  
 128  
 129  
 130  
 131

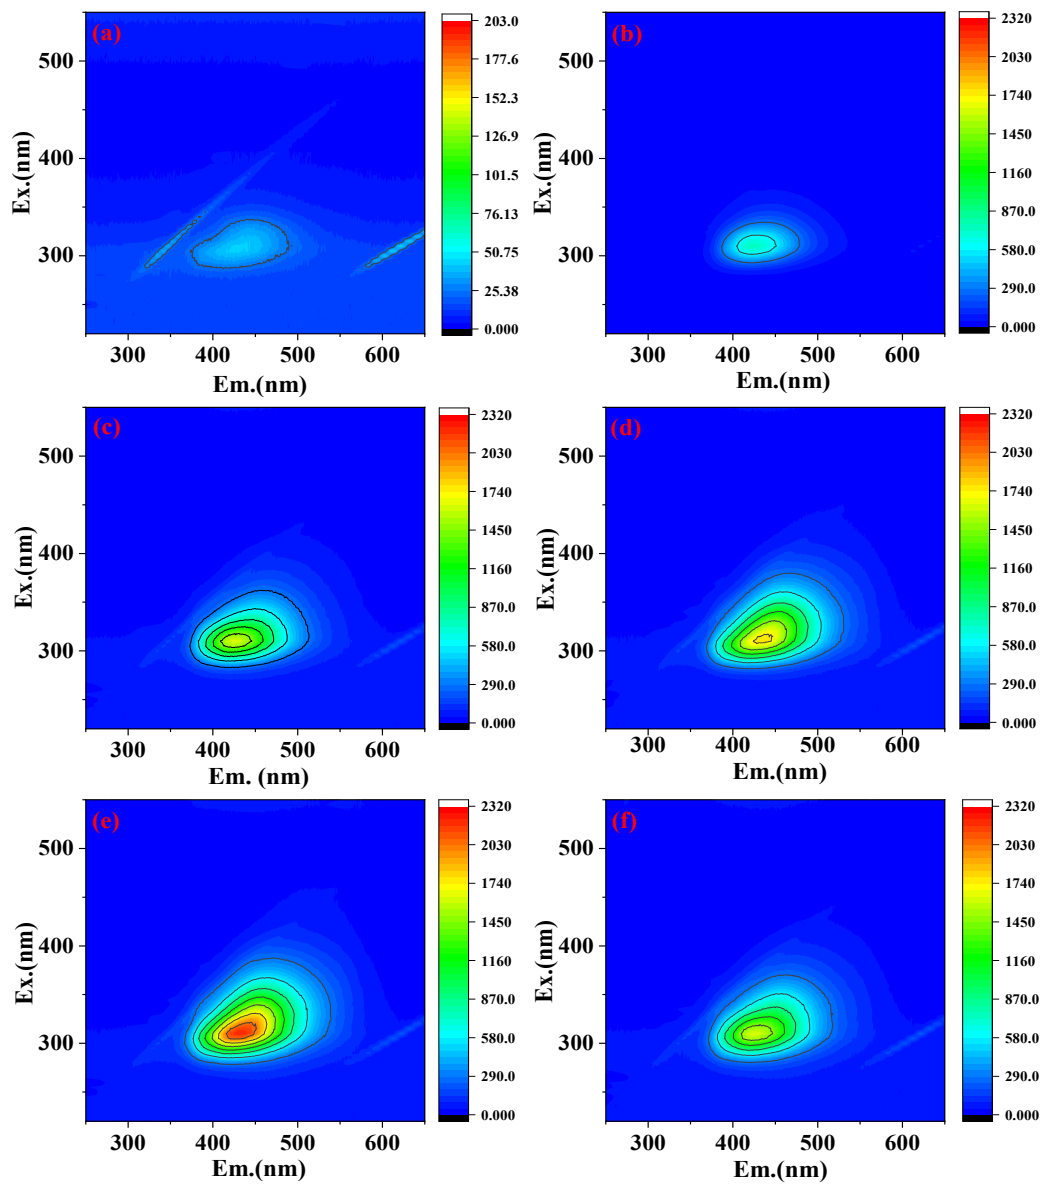

Fig. S9 EEM spectra of PSMPs-DOM<sub>x</sub> under 50 mg/L chlorination ((a)-(f), x = 6, 12, 30, 54, 84, 120 h)

132  
133  
134  
135  
136  
137  
138  
139  
140  
141

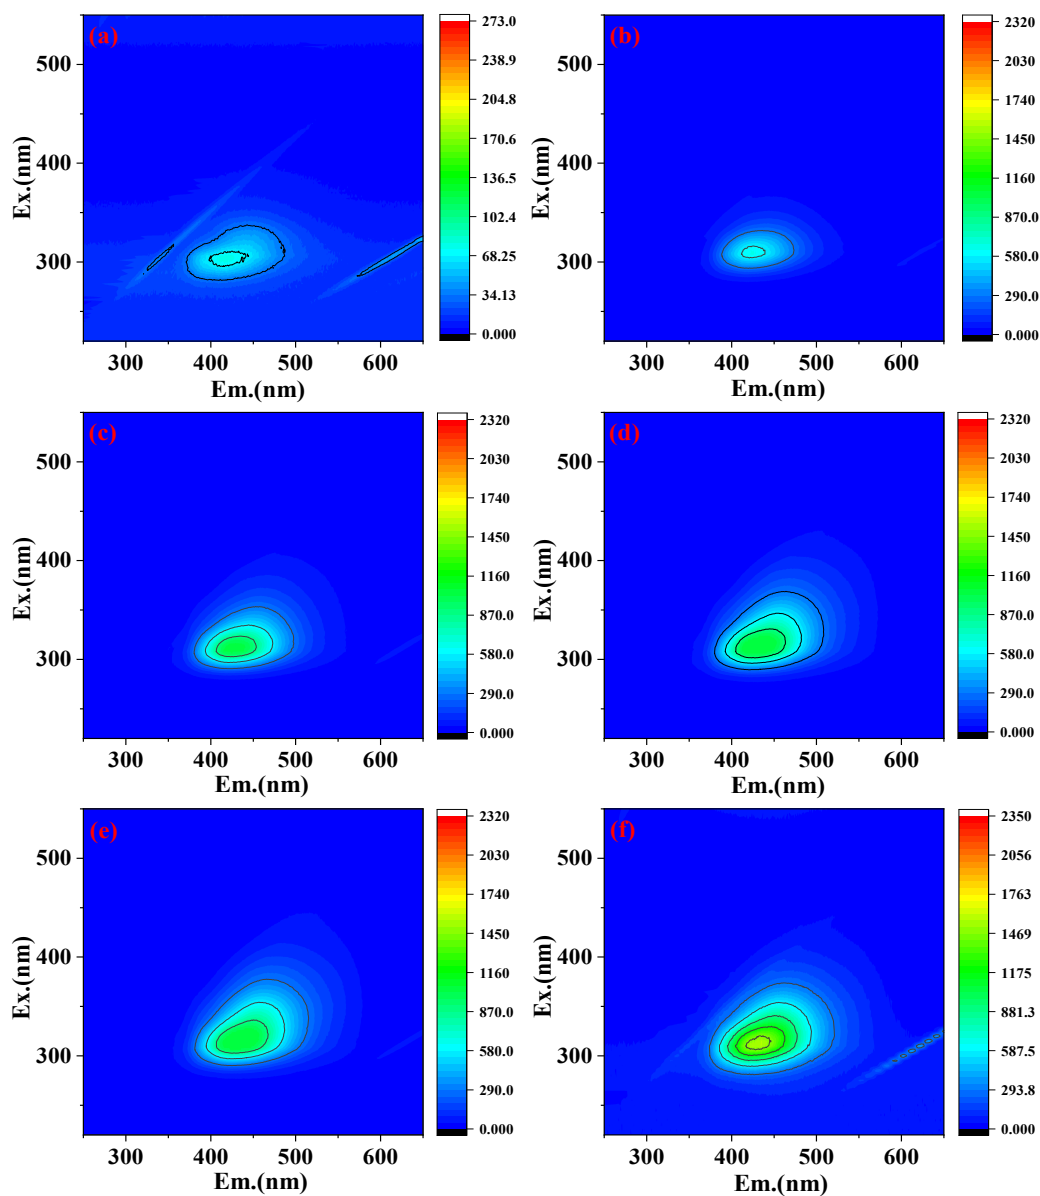

142  
 143  
 144  
 145

Fig. S10 EEM spectra of PSMPs-DOM<sub>x</sub> under 100 mg/L chlorination ((a)-(f), x = 6, 12, 30, 54, 84, 120 h)

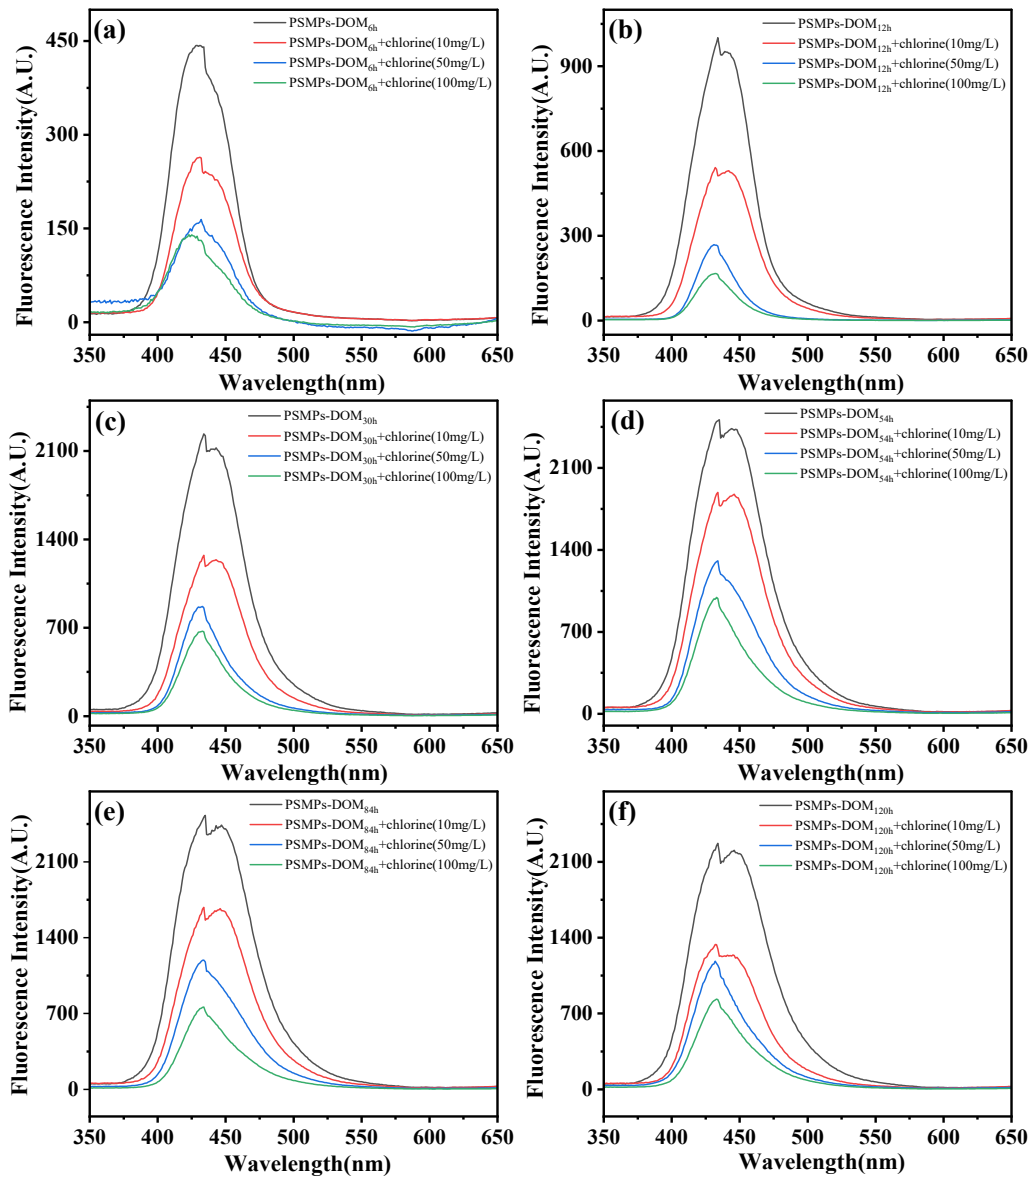

146  
147  
148  
149  
150  
151

Fig. S11 Synchronous fluorescence spectra of PSMPs-DOM before and after chlorination

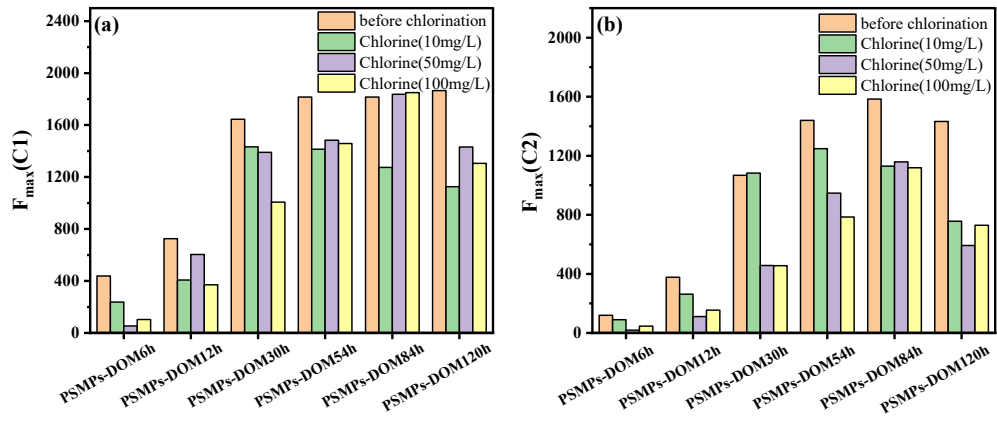

152  
153  
154

Fig. S12  $F_{\max}(C1)$  (a) and  $F_{\max}(C2)$  (b) of PSMPs-DOM before and after chlorination

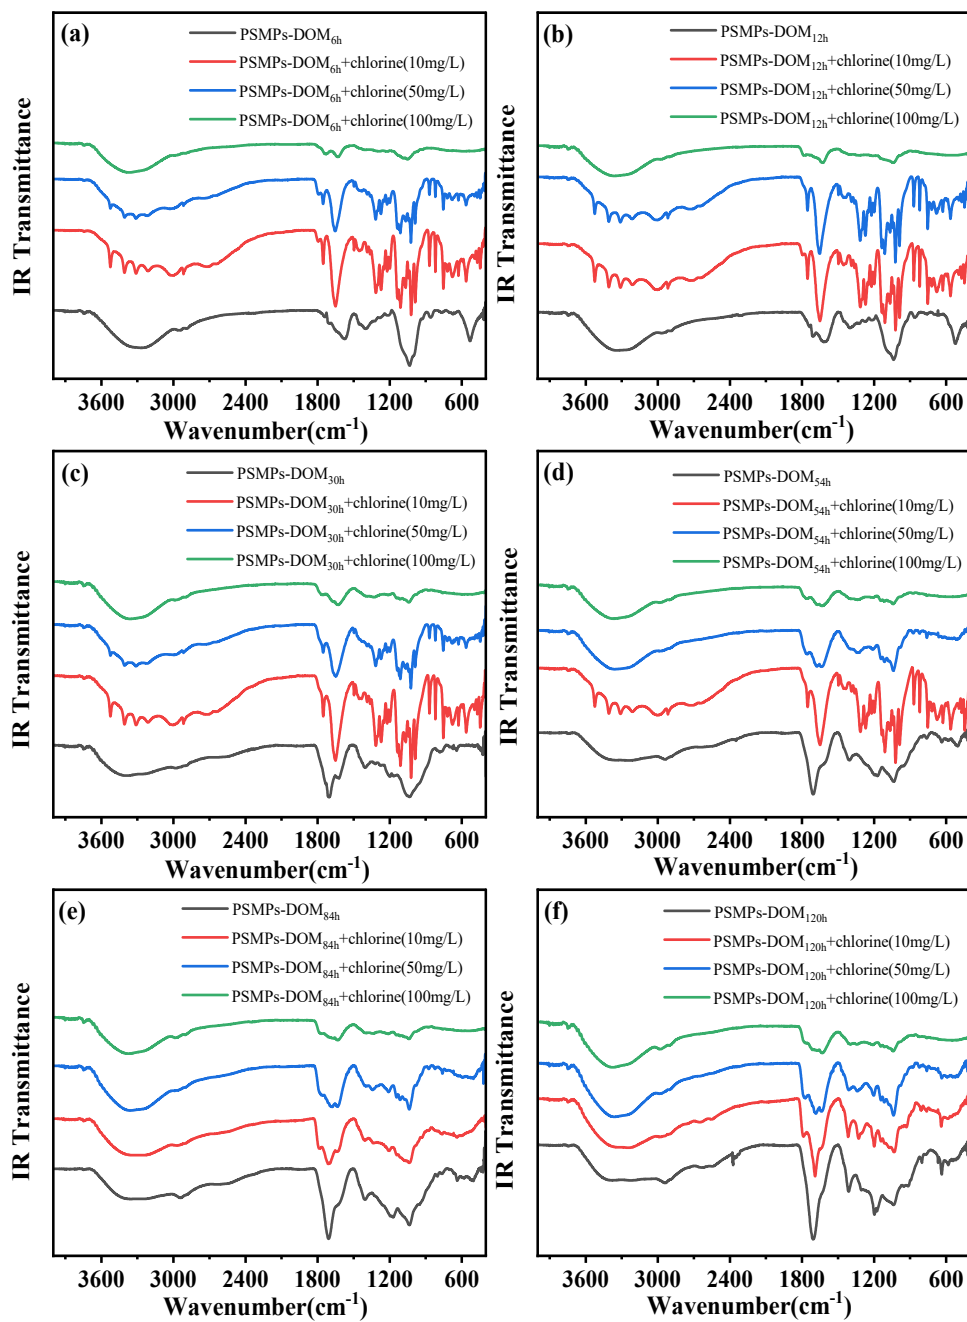

Fig. S13 FTIR spectra of PSMPs-DOM before and after chlorination

155  
156  
157  
158  
159  
160  
161  
162  
163  
164  
165  
166

167

Table S1. Analytical methods of THMs by GC-ECD

| GC/ECD                    | Agilent Technologies 7820A, USA                                                                                                                                                   |
|---------------------------|-----------------------------------------------------------------------------------------------------------------------------------------------------------------------------------|
| Column types              | HP-5, 30 m × 0.32 mm × 0.25 μm                                                                                                                                                    |
| Split ratio               | Splitless                                                                                                                                                                         |
| Injection volume          | 1 μL                                                                                                                                                                              |
| Injection Temperature     | 200°C                                                                                                                                                                             |
| Oven temperature and ramp | The initial temperature of 30°C for 10.5 min, then an increase of 14°C/min to 72°C, which was held for 1 min, and finally an increase of 40°C to 200°C, which was held for 2 min. |
| Detector temperature      | 300°C                                                                                                                                                                             |
| Carrier gas               | N <sub>2</sub> , constant flow at 3 mL/min                                                                                                                                        |

168

169

170

171

172

173

174

175

176

177

178

179

180

181

182

183

184

185

186

187

188

189

190

191

192

193

194

Table S2. The summary of Noda's rules for interpreting synchronous ( $\Phi(v_1, v_2)$ ) and asynchronous ( $\psi(v_1, v_2)$ ) cross peaks in 2D-COS analysis (Noda et al., 2000).

| sign at $\Phi(v_1, v_2)$ | sign at $\psi(v_1, v_2)$ | interpretation                                                                                              |
|--------------------------|--------------------------|-------------------------------------------------------------------------------------------------------------|
| +                        |                          | the intensity of $v_1$ and $v_2$ are changing in the same direction, i.e. increasing or decreasing together |
| -                        |                          | the intensity of $v_1$ and $v_2$ are changing in the opposite direction                                     |
| +                        | +                        | the change at $v_1$ is occurring predominantly before that at $v_2$                                         |
| +                        | -                        | the change at $v_1$ is occurring predominantly after that at $v_2$                                          |
| -                        | +                        | the change at $v_1$ is occurring predominantly after that at $v_2$                                          |
| -                        | -                        | the change at $v_1$ is occurring predominantly before that at $v_2$                                         |



Table S3. Main absorption bands of PSMPs in the IR regions and their identifying assignment groups.

| Wavenumber/ (cm <sup>-1</sup> ) | Functional groups | References           |
|---------------------------------|-------------------|----------------------|
| 3746                            | -OH               | (Chen et al., 2020)  |
| 2973                            | -CH               | (Zhang et al., 2020) |
| 2902                            | -CH <sub>2</sub>  | (Zhang et al., 2020) |
| 1730                            | C=O               | (Wang et al., 2023)  |
| 1066                            | C-O               | (Leng, 2018)         |

Table S4. DOC concentration of PSMPs-DOM under different UV irradiation time

| Samples   | UV irradiation time/ (h) | DOC/ (mg C/L) |
|-----------|--------------------------|---------------|
| PSMPs-DOM | 6                        | 8.71±0.17     |
|           | 12                       | 21.31±0.17    |
|           | 30                       | 68.33±0.21    |
|           | 54                       | 122.29±0.48   |
|           | 84                       | 184.62±0.05   |
|           | 120                      | 214.05±0.32   |

Table S5. UV parameters of PSMPs-DOM under different UV irradiation time

| Samples   | UV irradiation time/ (h) | $\alpha_{254}$ / (m <sup>-1</sup> ) | S <sub>275-295</sub> / (nm <sup>-1</sup> ) |
|-----------|--------------------------|-------------------------------------|--------------------------------------------|
| PSMPs-DOM | 6                        | 18.60±0.13                          | 0.018±0.002                                |
|           | 12                       | 49.43±0.18                          | 0.016±0.005                                |
|           | 30                       | 117.59±0.25                         | 0.015±0.007                                |
|           | 54                       | 184.12±0.10                         | 0.015±0.004                                |
|           | 84                       | 218.33±0.44                         | 0.015±0.001                                |
|           | 120                      | 179.84±0.19                         | 0.014±0.002                                |

Table S6. F<sub>max</sub> value of PSMPs-DOM under different UV irradiation time

| Samples   | UV irradiation time/ (h) | F <sub>max</sub> (C1) | F <sub>max</sub> (C2) |
|-----------|--------------------------|-----------------------|-----------------------|
| PSMPs-DOM | 6                        | 438                   | 119                   |
|           | 12                       | 726                   | 377                   |
|           | 30                       | 1644                  | 1068                  |
|           | 54                       | 1815                  | 1440                  |
|           | 84                       | 1815                  | 1585                  |
|           | 120                      | 1866                  | 1433                  |

Table S7.  $\Delta\alpha_{254}$  and  $\Delta S_{275-295}$  of PSMPs-DOM after chlorination

| Chlorine dosage/ (mg/L) | Samples                   | $\Delta\alpha_{254}/ (\text{m}^{-1})$ | $\Delta S_{275-295}/ (\text{nm}^{-1})$ |
|-------------------------|---------------------------|---------------------------------------|----------------------------------------|
| 10                      | PSMPs-DOM <sub>6h</sub>   | 2.38±0.27                             | 0.044±0.004                            |
|                         | PSMPs-DOM <sub>12h</sub>  | 5.08±0.32                             | 0.047±0.003                            |
|                         | PSMPs-DOM <sub>30h</sub>  | 24.83±2.46                            | 0.041±0.003                            |
|                         | PSMPs-DOM <sub>54h</sub>  | 36.35±2.80                            | 0.036±0.003                            |
|                         | PSMPs-DOM <sub>84h</sub>  | 74.54±3.41                            | 0.043±0.002                            |
|                         | PSMPs-DOM <sub>120h</sub> | 54.33±1.07                            | 0.062±0.004                            |
| 50                      | PSMPs-DOM <sub>6h</sub>   | 5.86±0.26                             | 0.071±0.004                            |
|                         | PSMPs-DOM <sub>12h</sub>  | 1.81±0.33                             | 0.074±0.006                            |
|                         | PSMPs-DOM <sub>30h</sub>  | 44.96±0.30                            | 0.061±0.005                            |
|                         | PSMPs-DOM <sub>54h</sub>  | 47.21±0.83                            | 0.064±0.003                            |
|                         | PSMPs-DOM <sub>84h</sub>  | 86.03±0.91                            | 0.050±0.002                            |
|                         | PSMPs-DOM <sub>120h</sub> | 78.71±1.05                            | 0.069±0.002                            |
| 100                     | PSMPs-DOM <sub>6h</sub>   | 0.92±0.10                             | 0.083±0.001                            |
|                         | PSMPs-DOM <sub>12h</sub>  | 17.60±0.17                            | 0.071±0.004                            |
|                         | PSMPs-DOM <sub>30h</sub>  | 62.46±2.71                            | 0.070±0.003                            |
|                         | PSMPs-DOM <sub>54h</sub>  | 81.89±1.87                            | 0.059±0.007                            |
|                         | PSMPs-DOM <sub>84h</sub>  | 90.65±4.09                            | 0.059±0.006                            |
|                         | PSMPs-DOM <sub>120h</sub> | 54.22±4.16                            | 0.063±0.001                            |

Table S8. Relative percentage of C1 and C2 in PSMPs-DOM before and after chlorination

| Samples                   | Chlorine dosage/ (mg/L) | C1/ (%) | C2/ (%) |
|---------------------------|-------------------------|---------|---------|
| PSMPs-DOM <sub>6h</sub>   | 0                       | 78.61   | 21.39   |
|                           | 10                      | 72.58   | 27.42   |
|                           | 50                      | 73.83   | 26.17   |
|                           | 100                     | 69.14   | 30.86   |
| PSMPs-DOM <sub>12h</sub>  | 0                       | 65.80   | 34.20   |
|                           | 10                      | 60.84   | 39.16   |
|                           | 50                      | 84.51   | 15.49   |
|                           | 100                     | 70.56   | 29.44   |
| PSMPs-DOM <sub>30h</sub>  | 0                       | 60.62   | 39.38   |
|                           | 10                      | 56.95   | 43.05   |
|                           | 50                      | 75.27   | 24.73   |
|                           | 100                     | 68.84   | 31.16   |
| PSMPs-DOM <sub>54h</sub>  | 0                       | 55.76   | 44.24   |
|                           | 10                      | 53.11   | 46.88   |
|                           | 50                      | 61.02   | 38.98   |
|                           | 100                     | 65.00   | 35.00   |
| PSMPs-DOM <sub>84h</sub>  | 0                       | 53.39   | 46.61   |
|                           | 10                      | 52.98   | 47.02   |
|                           | 50                      | 61.33   | 38.67   |
|                           | 100                     | 62.31   | 37.69   |
| PSMPs-DOM <sub>120h</sub> | 0                       | 56.57   | 43.43   |
|                           | 10                      | 59.78   | 40.22   |
|                           | 50                      | 70.74   | 29.26   |
|                           | 100                     | 64.16   | 35.84   |

Table S9. Main absorption bands of PSMPs-DOM in the IR regions and their identifying assignment groups.

| Samples                                   | Wavenumber/ (cm <sup>-1</sup> ) | Functional groups | References           |
|-------------------------------------------|---------------------------------|-------------------|----------------------|
| PSMPs-DOM <sub>x</sub><br>(x=6,12,30,54h) | 1654                            | Aromatic C=C/C=O  | (Lee et al., 2021)   |
|                                           | 1314                            | C-OH              | (Leng, 2018)         |
|                                           | 1270                            | C-O               | (Zhang et al., 2022) |
|                                           | 1139                            | C-O-C             | (Gu et al., 2024)    |
|                                           | 1022                            | Aromatic C-H      | (Lee et al., 2021)   |
| PSMPs-DOM <sub>x</sub><br>(x=84,120h)     | 1721                            | O-C=O             | (Liu et al., 2019)   |
|                                           | 1139                            | C-O-C             | (Gu et al., 2024)    |
|                                           | 1022                            | Aromatic C-H      | (Lee et al., 2021)   |

Table S10. 2D-FTIR-COS results of cross-peaks in synchronous and asynchronous maps

| Group                     | Position/ (cm <sup>-1</sup> ) | Sign |      |      |      |      |      |      |
|---------------------------|-------------------------------|------|------|------|------|------|------|------|
| PSMPs-DOM <sub>6h</sub>   |                               | 1754 | 1654 | 1300 | 1270 | 1111 | 1022 | 988  |
|                           | 1754                          | +    | +(+) | +(+) | +(+) | +(+) | +(+) | +(+) |
|                           | 1654                          |      | +    | +(-) | +(+) | +(+) | +(+) | +(+) |
|                           | 1300                          |      |      | +    | +(+) | +(+) | +(+) | +(+) |
|                           | 1270                          |      |      |      | +    | +(+) | +(+) | +(+) |
|                           | 1111                          |      |      |      |      | +    | +(+) | +(+) |
|                           | 1022                          |      |      |      |      |      | +    | +(+) |
|                           | 988                           |      |      |      |      |      |      | +    |
| PSMPs-DOM <sub>12h</sub>  |                               | 1754 | 1654 | 1300 | 1270 | 1111 | 1022 | 988  |
|                           | 1754                          | +    | +(-) | +(-) | +(-) | +(+) | +(+) | +(+) |
|                           | 1654                          |      | +    | +(-) | +(-) | +(+) | +(+) | +(+) |
|                           | 1300                          |      |      | +    | +(+) | +(+) | +(+) | +(+) |
|                           | 1270                          |      |      |      | +    | +(+) | +(+) | +(+) |
|                           | 1111                          |      |      |      |      | +    | +(+) | +(+) |
|                           | 1022                          |      |      |      |      |      | +    | +(-) |
|                           | 988                           |      |      |      |      |      |      | +    |
| PSMPs-DOM <sub>30h</sub>  |                               | 1754 | 1654 | 1300 | 1270 | 1111 | 1022 | 988  |
|                           | 1754                          | +    | +(-) | +(-) | +(-) | +(-) | +(+) | +(+) |
|                           | 1654                          |      | +    | +(-) | +(+) | +(+) | +(+) | +(+) |
|                           | 1300                          |      |      | +    | +(+) | +(+) | +(+) | +(+) |
|                           | 1270                          |      |      |      | +    | +(-) | +(+) | +(+) |
|                           | 1111                          |      |      |      |      | +    | +(+) | +(+) |
|                           | 1022                          |      |      |      |      |      | +    | +(+) |
|                           | 988                           |      |      |      |      |      |      | +    |
| PSMPs-DOM <sub>54h</sub>  |                               | 1754 | 1654 | 1300 | 1270 | 1111 | 1022 | 988  |
|                           | 1754                          | +    | +(+) | +(+) | +(+) | +(+) | +(+) | +(+) |
|                           | 1654                          |      | +    | +(+) | +(+) | +(+) | +(+) | +(+) |
|                           | 1300                          |      |      | +    | +(+) | +(-) | +(-) | +(+) |
|                           | 1270                          |      |      |      | +    | +(-) | +(-) | +(-) |
|                           | 1111                          |      |      |      |      | +    | +(+) | +(+) |
|                           | 1022                          |      |      |      |      |      | +    | +(+) |
|                           | 988                           |      |      |      |      |      |      | +    |
| PSMPs-DOM <sub>84h</sub>  |                               | 1709 | 1173 | 1032 |      |      |      |      |
|                           | 1709                          | +    | +(+) | +(-) |      |      |      |      |
|                           | 1173                          |      | +    | +(-) |      |      |      |      |
|                           | 1032                          |      |      | +    |      |      |      |      |
| PSMPs-DOM <sub>120h</sub> |                               | 1709 | 1173 | 1032 |      |      |      |      |
|                           | 1709                          | +    | +(+) | +(+) |      |      |      |      |
|                           | 1173                          |      | +    | +(+) |      |      |      |      |
|                           | 1032                          |      |      | +    |      |      |      |      |

Table S11. Formation potential of each THMs and total THMs in chlorinated PSMPs-DOM

| Chlorine dosage/ (mg/L) | Samples                   | TCM/ ( $\mu\text{g}/\text{mg C}$ ) | DCBM/ ( $\mu\text{g}/\text{mg C}$ ) | DBCM/ ( $\mu\text{g}/\text{mg C}$ ) | TBM/ ( $\mu\text{g}/\text{mg C}$ ) | total THMs/ ( $\mu\text{g}/\text{mg C}$ ) |
|-------------------------|---------------------------|------------------------------------|-------------------------------------|-------------------------------------|------------------------------------|-------------------------------------------|
| 10                      | PSMPs-DOM <sub>6h</sub>   | 4.72±0.08                          | 2.35±0.017                          | 2.31±0.005                          | 1.30±0.010                         | 10.68±0.10                                |
|                         | PSMPs-DOM <sub>12h</sub>  | 1.00±0.007                         | 0.86±0.003                          | 1.03±0.001                          | 0.55±0.001                         | 3.43±0.005                                |
|                         | PSMPs-DOM <sub>30h</sub>  | 0.23±0.002                         | 0.28±0.002                          | 0.45±0.009                          | 0.19±0.004                         | 1.16±0.006                                |
|                         | PSMPs-DOM <sub>54h</sub>  | 0.12±0.001                         | 0.16±0.003                          | 0.27±0.005                          | 0.11±0.007                         | 0.66±0.004                                |
|                         | PSMPs-DOM <sub>84h</sub>  | 0.01±0.003                         | 0.10±0.003                          | 0.16±0.002                          | 0.14±0.002                         | 0.42±0.002                                |
|                         | PSMPs-DOM <sub>120h</sub> | 0.01±0.004                         | 0.09±0.004                          | 0.14±0.001                          | 0.13±0.002                         | 0.37±0.001                                |
| 50                      | PSMPs-DOM <sub>6h</sub>   | 15.99±0.01                         | 2.10±0.003                          | 1.55±0.003                          | 0.94±0.003                         | 20.58±0.02                                |
|                         | PSMPs-DOM <sub>12h</sub>  | 7.95±0.08                          | 0.98±0.007                          | 0.95±0.001                          | 0.60±0.007                         | 10.48±0.09                                |
|                         | PSMPs-DOM <sub>30h</sub>  | 0.93±0.02                          | 0.39±0.001                          | 0.43±0.001                          | 0.28±0.002                         | 2.02±0.02                                 |
|                         | PSMPs-DOM <sub>54h</sub>  | 0.28±0.004                         | 0.17±0.002                          | 0.27±0.004                          | 0.13±0.008                         | 0.85±0.01                                 |
|                         | PSMPs-DOM <sub>84h</sub>  | 0.17±0.005                         | 0.13±0.001                          | 0.20±0.002                          | 0.13±0.005                         | 0.63±0.006                                |
|                         | PSMPs-DOM <sub>120h</sub> | 0.12±0.003                         | 0.12±0.001                          | 0.15±0.003                          | 0.14±0.007                         | 0.53±0.008                                |
| 100                     | PSMPs-DOM <sub>6h</sub>   | 21.10±0.39                         | 2.52±0.02                           | 1.59±0.002                          | 1.09±0.032                         | 26.30±0.39                                |
|                         | PSMPs-DOM <sub>12h</sub>  | 13.52±0.17                         | 1.53±0.02                           | 1.20±0.001                          | 0.81±0.012                         | 17.06±0.14                                |
|                         | PSMPs-DOM <sub>30h</sub>  | 2.79±0.07                          | 0.57±0.004                          | 0.50±0.001                          | 0.32±0.011                         | 4.17±0.08                                 |
|                         | PSMPs-DOM <sub>54h</sub>  | 0.75±0.02                          | 0.24±0.003                          | 0.33±0.003                          | 0.16±0.001                         | 1.48±0.02                                 |
|                         | PSMPs-DOM <sub>84h</sub>  | 0.49±0.01                          | 0.15±0.002                          | 0.21±0.005                          | 0.10±0.002                         | 0.96±0.02                                 |
|                         | PSMPs-DOM <sub>120h</sub> | 0.36±0.005                         | 0.12±0.004                          | 0.14±0.002                          | 0.08±0.002                         | 0.70±0.004                                |

## References:

- Chen, W., Ding, S., Lin, Z., Peng, Y., Ni, J., 2020. Different effects of N<sub>2</sub>-flow and air-limited pyrolysis on bamboo-derived biochars' nitrogen and phosphorus release and sorption characteristics. *Science of The Total Environment* 711, 134828. <https://doi.org/10.1016/j.scitotenv.2019.134828>
- Gu, X., Chen, B., Liu, H., Feng, Y., Wang, B., He, S., Feng, M., Pan, G., Han, S., 2024. Photochemical behavior of dissolved organic matter derived from *Alternanthera philoxeroides* hydrochar: Insights from molecular transformation and photochemically reactive intermediates. *Journal of Hazardous Materials* 461, 132591. <https://doi.org/10.1016/j.jhazmat.2023.132591>
- Lee, Y.K., Hong, S., Hur, J., 2021. Copper-binding properties of microplastic-derived dissolved organic matter revealed by fluorescence spectroscopy and two-dimensional correlation spectroscopy. *Water Research* 190, 116775. <https://doi.org/10.1016/j.watres.2020.116775>
- Leng, E., 2018. In situ structural changes of crystalline and amorphous cellulose during slow pyrolysis at low temperatures.
- Liu, S., Feng, W., Song, F., Li, T., Guo, W., Wang, B., Wang, H., Wu, F., 2019. Photodegradation of algae and macrophyte-derived dissolved organic matter: A multi-method assessment of DOM transformation. *Limnologia* 77, 125683. <https://doi.org/10.1016/j.limno.2019.125683>
- Noda, I., Dowrey, A.E., Marcott, C., Story, G.M., Ozaki, Y., n.d. Generalized Two-Dimensional Correlation Spectroscopy.
- Wang, H., Zhu, J., He, Y., Wang, J., Zeng, N., Zhan, X., 2023. Photoaging process and mechanism of four commonly commercial microplastics. *Journal of Hazardous Materials* 451, 131151. <https://doi.org/10.1016/j.jhazmat.2023.131151>
- Zhang, H., Chen, W., Li, Q., Zhang, X., Wang, C., Yang, L., Wei, R., Ni, J., 2020. Difference in characteristics and nutrient retention between biochars produced in nitrogen-flow and air-limitation atmospheres. *J of Env Quality* 49, 1396–1407. <https://doi.org/10.1002/jeq2.20133>
- Zhang, H., Qian, W., Wu, L., Yu, S., Wei, R., Chen, W., Ni, J., 2022. Spectral characteristics of dissolved organic carbon (DOC) derived from biomass pyrolysis: Biochar-derived DOC versus smoke-derived DOC, and their differences from natural DOC. *Chemosphere* 302, 134869. <https://doi.org/10.1016/j.chemosphere.2022.134869>
